# Supplementary material for: Four new isocoumarins from Cajanus cajan
Source: Royal Society of Chemistry journal article supplement (doi:10.1039/d3ra08149d), 2024-01-01
Supplement: d3ra08149d1.pdf [file d3ra08149d1.pdf]

## Four New Isocoumarins from *Cajanus cajan*

Liyuan Yao<sup>a,b,c</sup>, Aikebaier Jumai<sup>a,b</sup>, Xiaobao Huang<sup>a,e</sup>, Tingting Lin<sup>a</sup>, Zhengguo Tao<sup>d</sup>,  
and Sheng-Xiang Qiu<sup>a,b</sup> \*

<sup>a</sup> State Key Laboratory of Plant Diversity and Specialty Crops & Guangdong  
Provincial Key Laboratory of Applied Botany, South China Botanical Garden,  
Chinese Academy of Sciences, Guangzhou 510650, China

<sup>b</sup> South China National Botanical Garden, Guangzhou 510650, P. R. China

<sup>c</sup> University of Chinese Academy of Sciences, Beijing 100049, P. R. China

<sup>d</sup> Guangzhou Leader Biotechnology Co., LTD, Guangzhou, 510650, China.

<sup>e</sup> Visiting student from the Department of Chemistry, University of Wisconsin-  
Madison, USA

-----  
\* Corresponding author. Address: Program for Natural Product Chemical Biology,  
South China Botanical Garden, Chinese Academy of Sciences, Guangzhou, China.  
Tel.: +86-13924031914; Fax: +86-20-37081190

E-mail address: [sxqiu@scbg.ac.cn](mailto:sxqiu@scbg.ac.cn)

### Abstract

Four new isocoumarins, denominated Cajanolactone B, C, D1 and D2 (**1-4**), were isolated from ethanolic extract of the leaves of *Cajanus cajan*. The structural elucidation has been completed mainly depending on extensively spectroscopic analysis including UV, IR, NMR (1D and 2D), HRESIMS and chiral analysis. Notably, all these new isocoumarins were found to exist in racemic forms, among which compounds **3** and **4** share the same planar structure. This finding suggests that at least the biosynthesis of isocoumarin in *C. cajan* is chiral tolerant. A plausible biogenetic pathway of compounds **1-4** is proposed.

## **Supporting Information**

|                                                             |             |
|-------------------------------------------------------------|-------------|
| NMR, HRESIMS, IR, UV and CD spectra of Cajanolactone B (1)  | Pages 3-7   |
| NMR, HRESIMS, IR, UV and CD spectra of Cajanolactone C (2)  | Pages 8-12  |
| NMR, HRESIMS, IR, UV and CD spectra of Cajanolactone D1 (3) | Pages 13-17 |
| NMR, HRESIMS, IR, UV and CD spectra of Cajanolactone D2 (4) | Pages 18-22 |

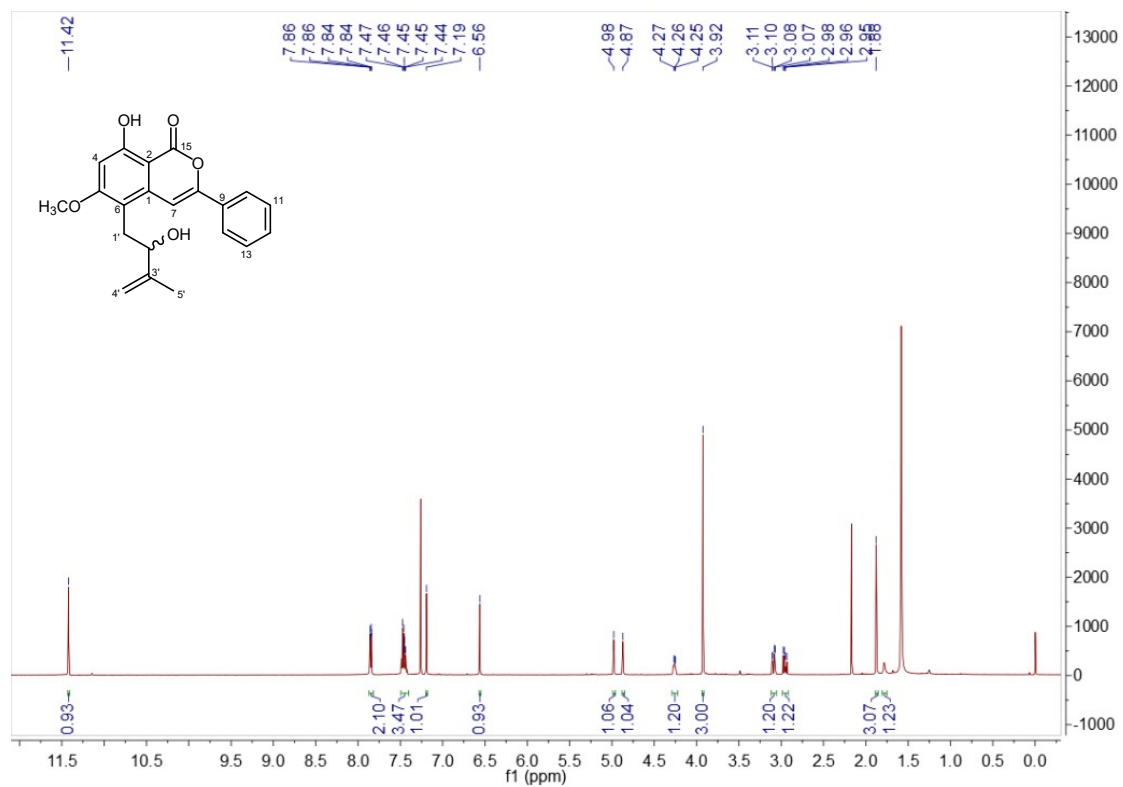

Figure S1. <sup>1</sup>H NMR spectrum (500 MHz, CDCl<sub>3</sub>) of **1**.

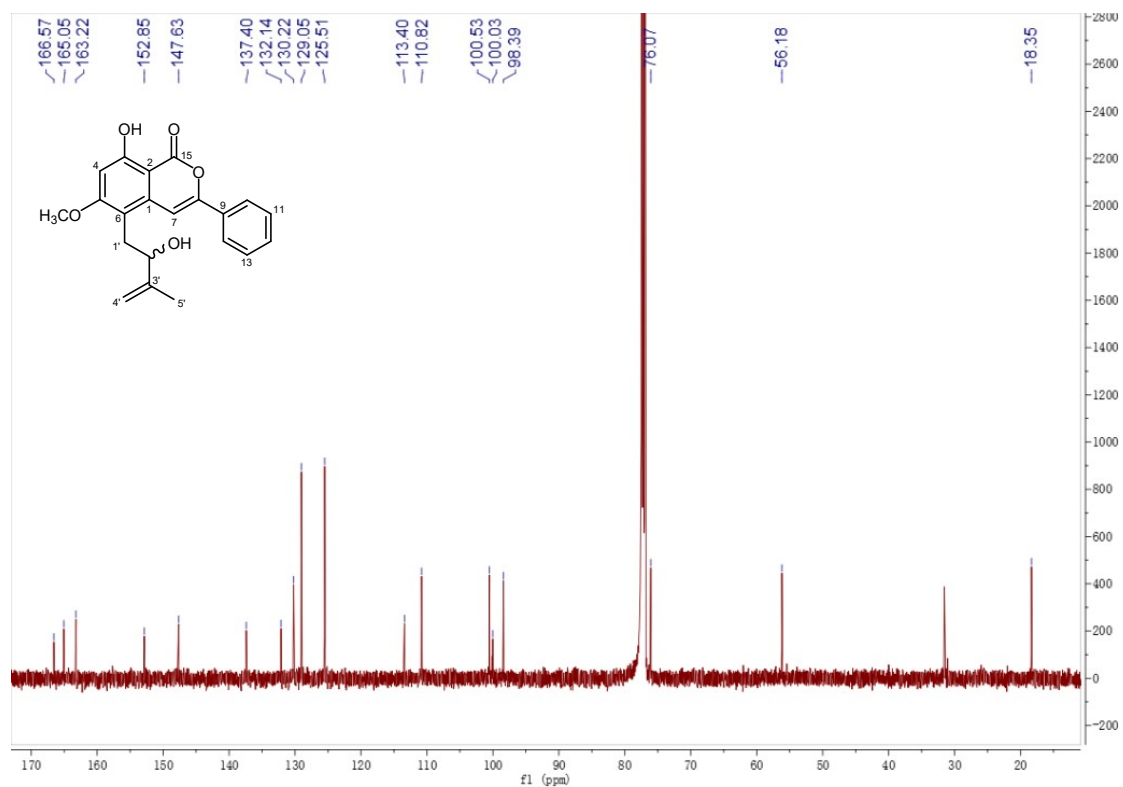

Figure S2. <sup>13</sup>C NMR spectrum (125 MHz, CDCl<sub>3</sub>) of **1**.



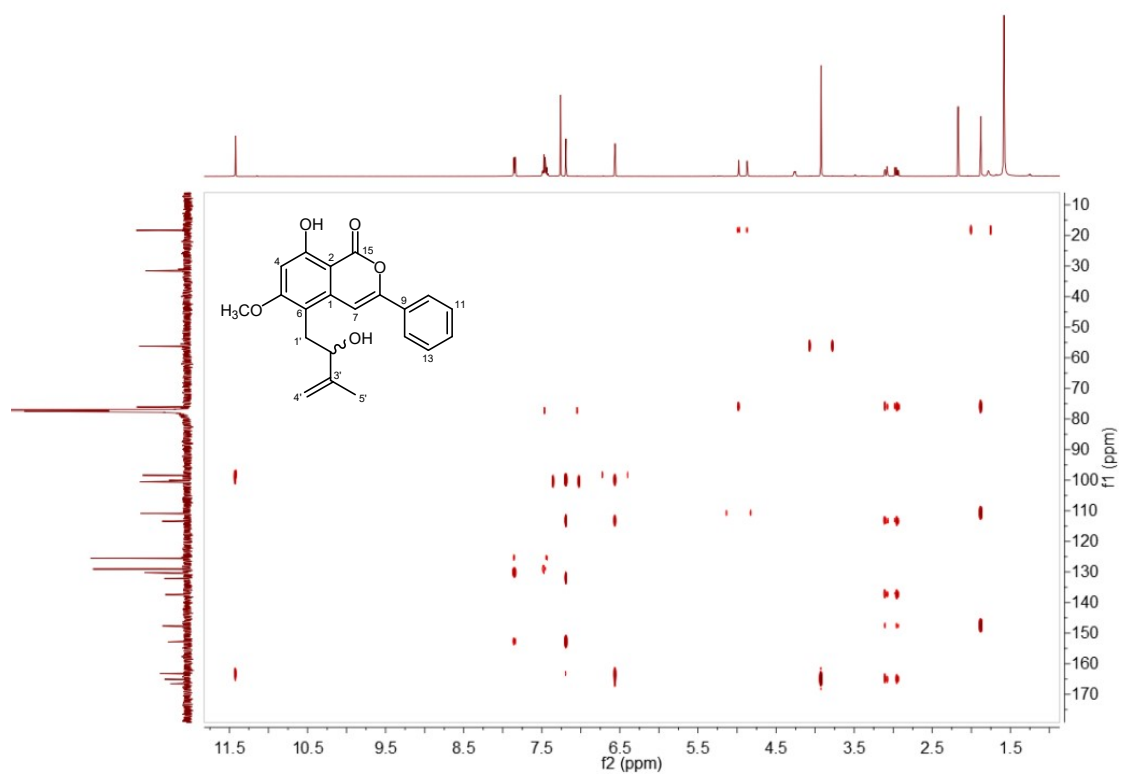

Figure S5. HMBC spectrum of 1.

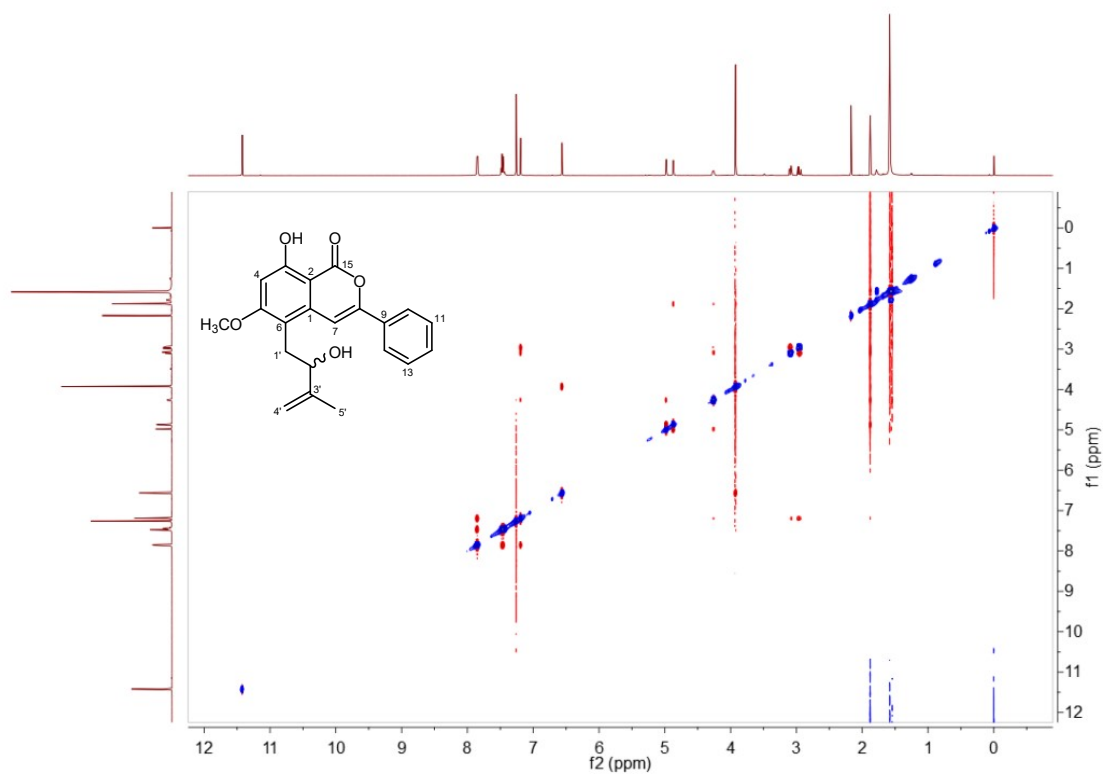

Figure S6. NOESY spectrum of 1.

## Mass Spectrum SmartFormula Report

| Analysis Info         |                                                               |                      |          | Acquisition Date     |              |
|-----------------------|---------------------------------------------------------------|----------------------|----------|----------------------|--------------|
| Analysis Name         | D:\Data\MS\data\202209\yaoliyuan_HC10-6222a_pos_72_01_13624.d |                      |          | 9/8/2022 10:57:38 AM |              |
| Method                | LC_Direct Infusion_pos_70-500mz.m                             |                      |          | Operator             | SCSIO        |
| Sample Name           | yaoliyuan_HC10-6222a_pos                                      |                      |          | Instrument           | maXis        |
| Comment               |                                                               |                      |          |                      | 255552.00029 |
| Acquisition Parameter |                                                               |                      |          |                      |              |
| Source Type           | ESI                                                           | Ion Polarity         | Positive | Set Nebulizer        | 0.4 Bar      |
| Focus                 | Active                                                        | Set Capillary        | 4500 V   | Set Dry Heater       | 180 °C       |
| Scan Begin            | 100 m/z                                                       | Set End Plate Offset | -500 V   | Set Dry Gas          | 4.0 l/min    |
| Scan End              | 1500 m/z                                                      | Set Charging Voltage | 0 V      | Set Divert Valve     | Waste        |
|                       |                                                               | Set Corona           | 0 nA     | Set APCI Heater      | 0 °C         |

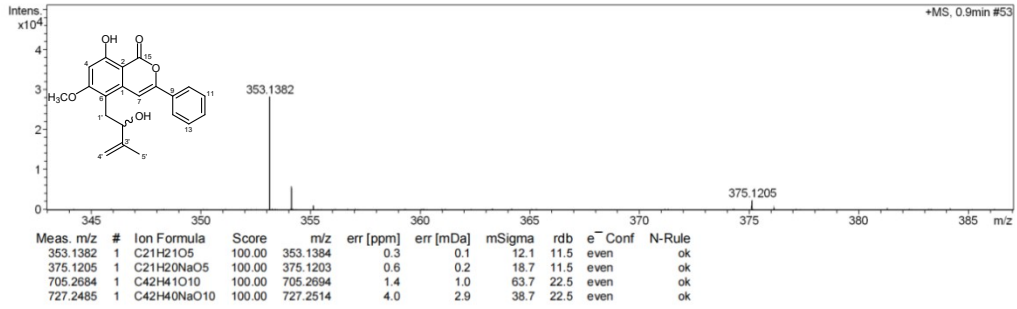

**Figure S7.** HRESIMS spectrum of **1**.

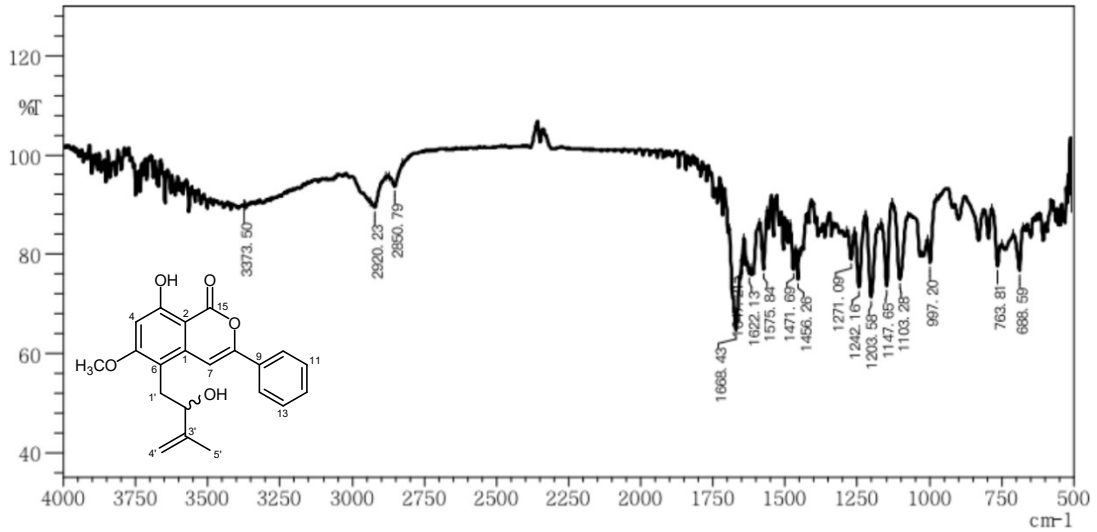

**Figure S8.** IR spectrum of **1**.

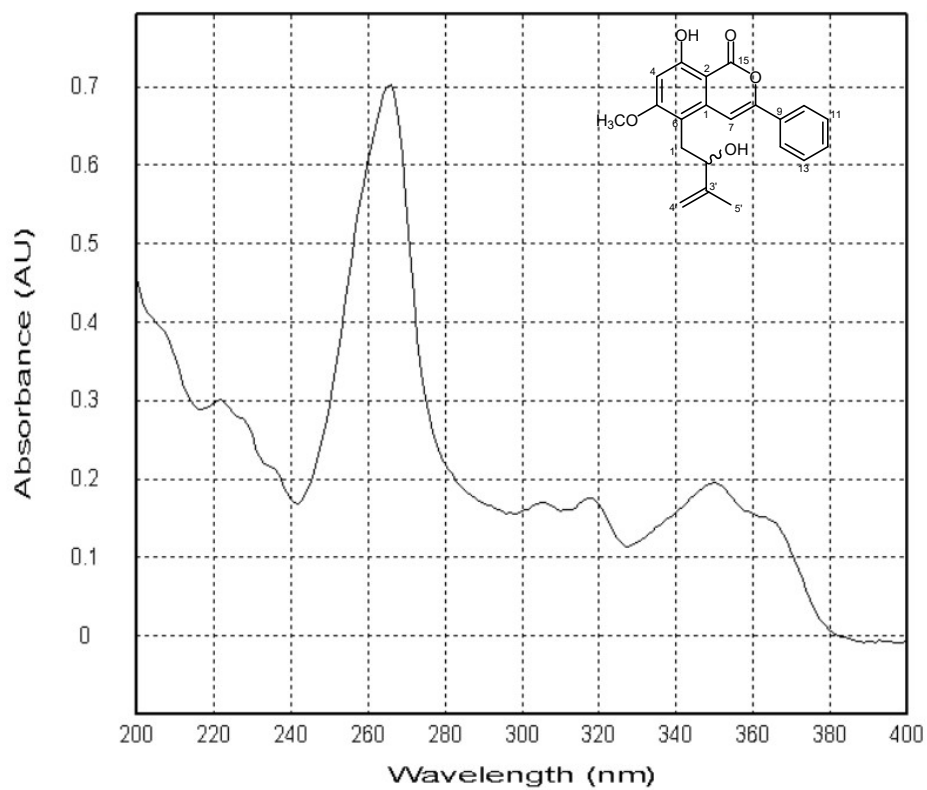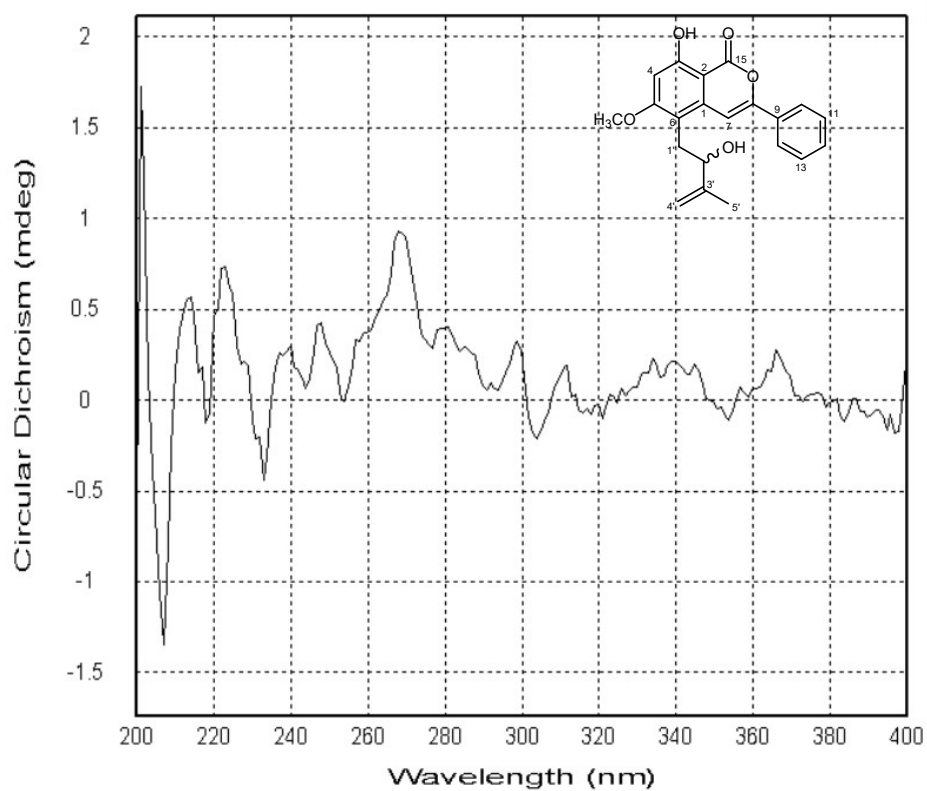

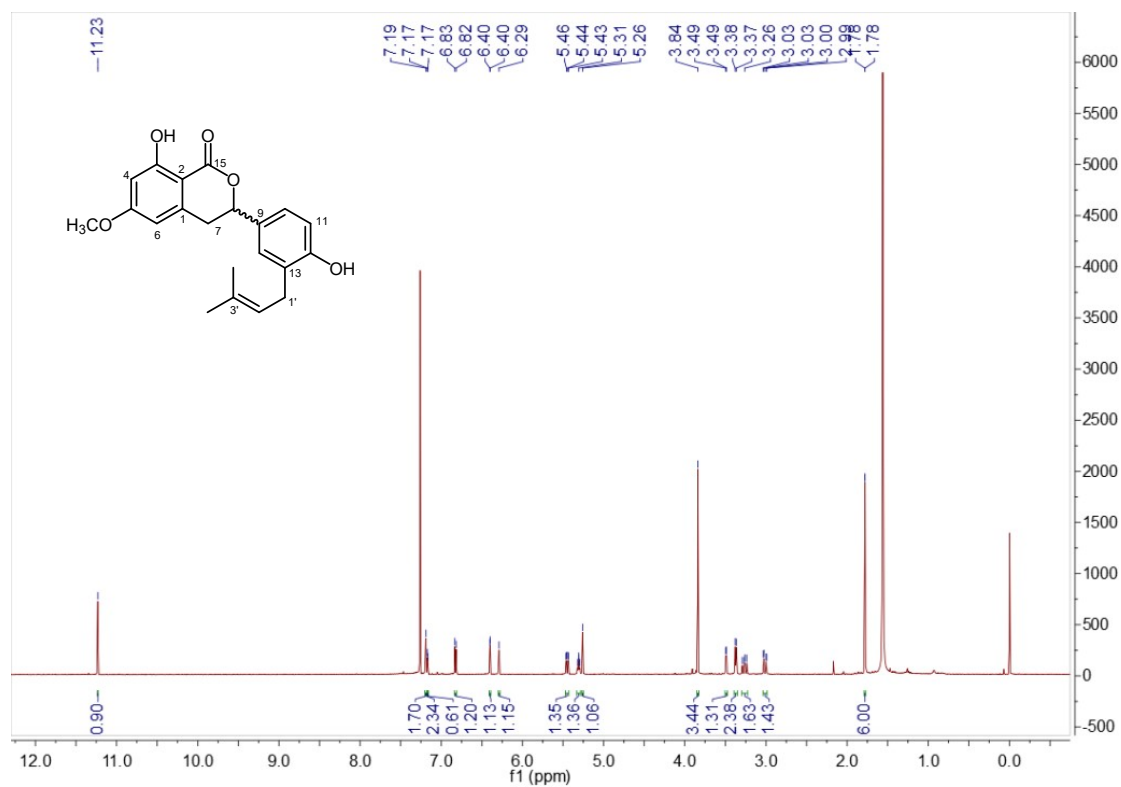

Figure S11. <sup>1</sup>H NMR spectrum (500 MHz, CDCl<sub>3</sub>) of 2.

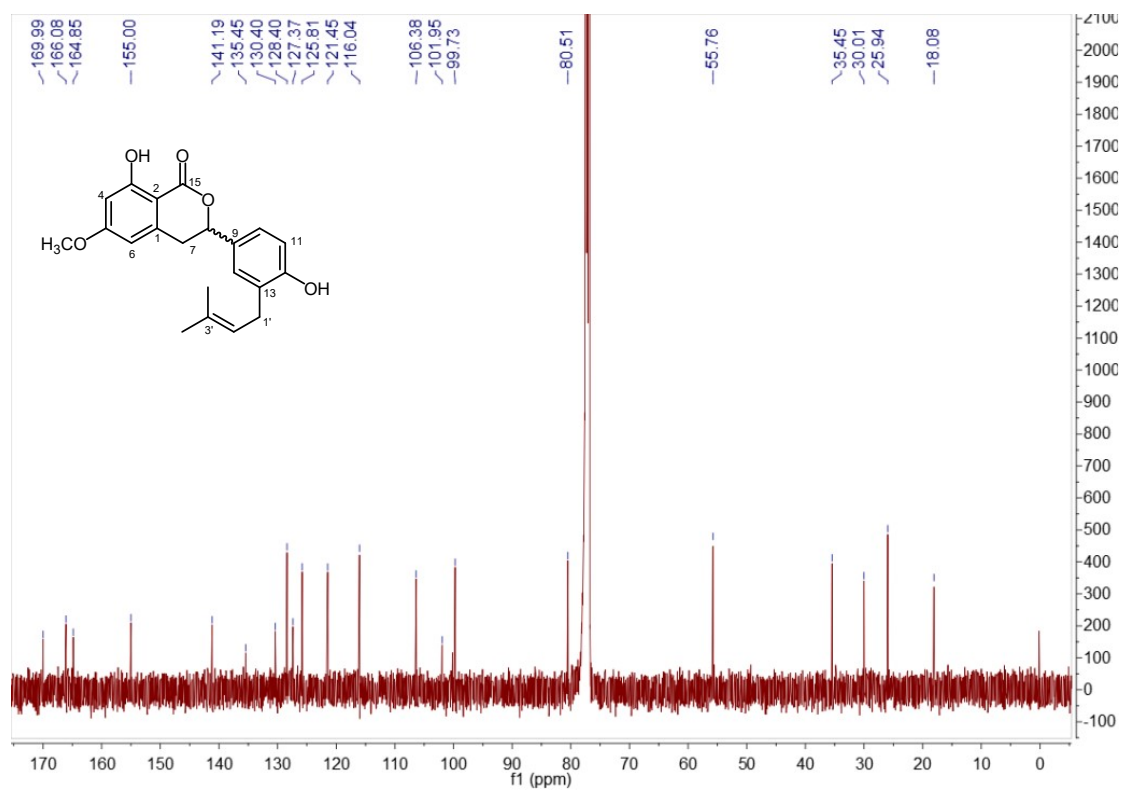

Figure S12. <sup>13</sup>C NMR spectrum (125 MHz, CDCl<sub>3</sub>) of 2.



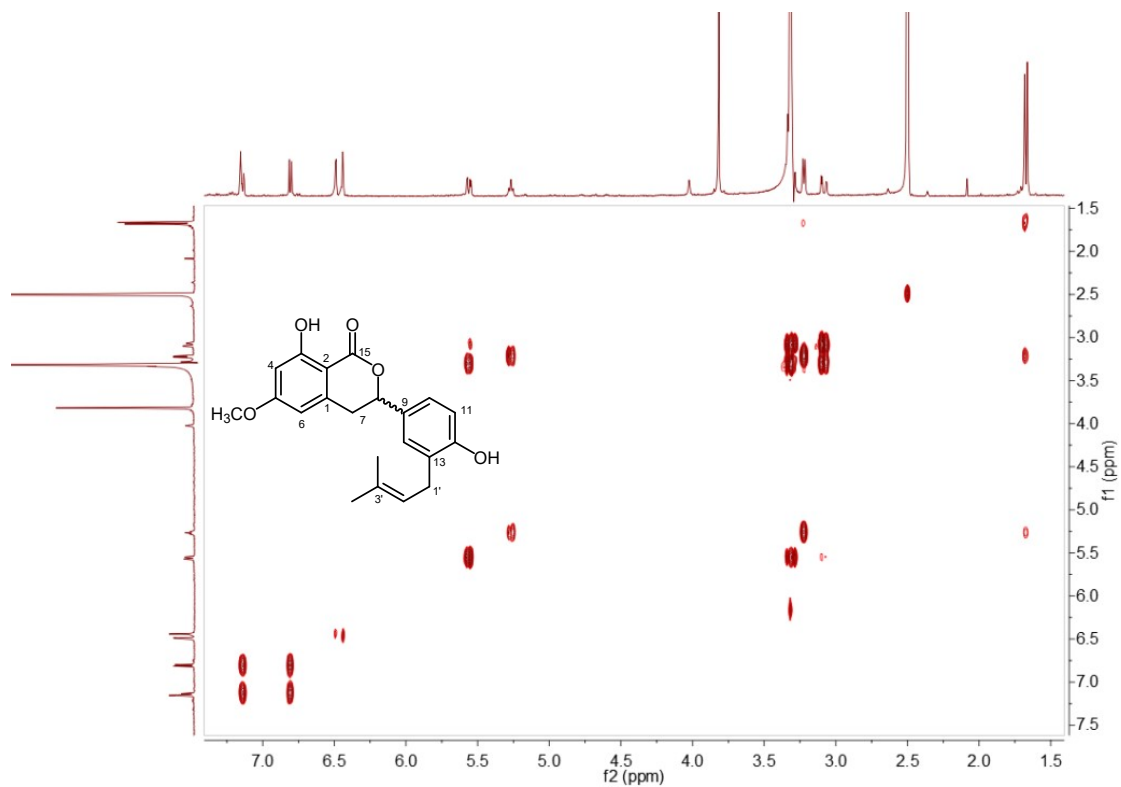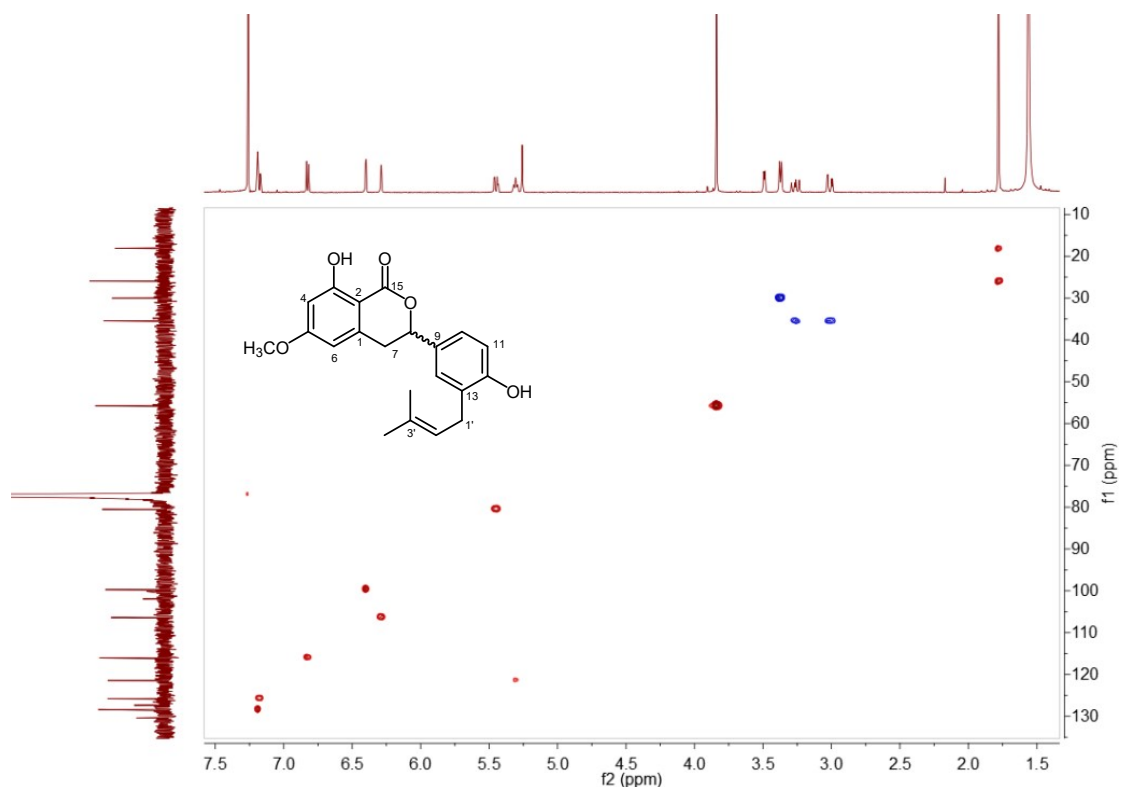

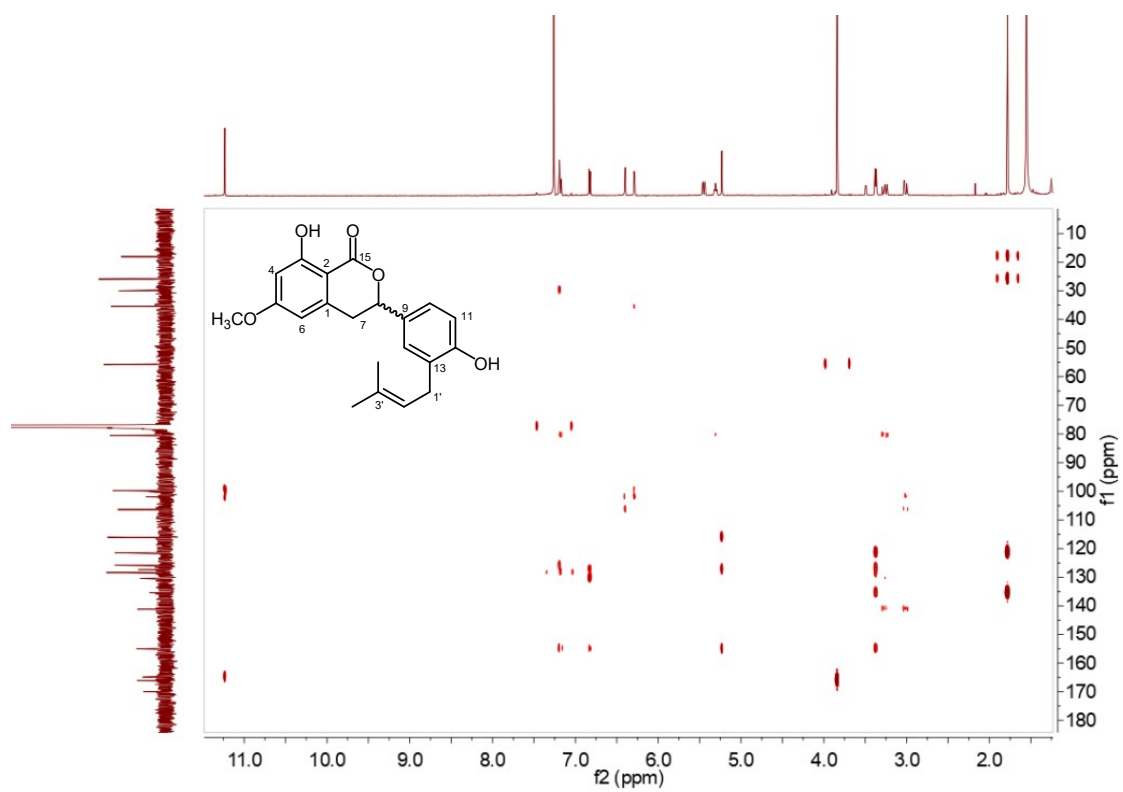

Figure S15. HMBC spectrum of 2.

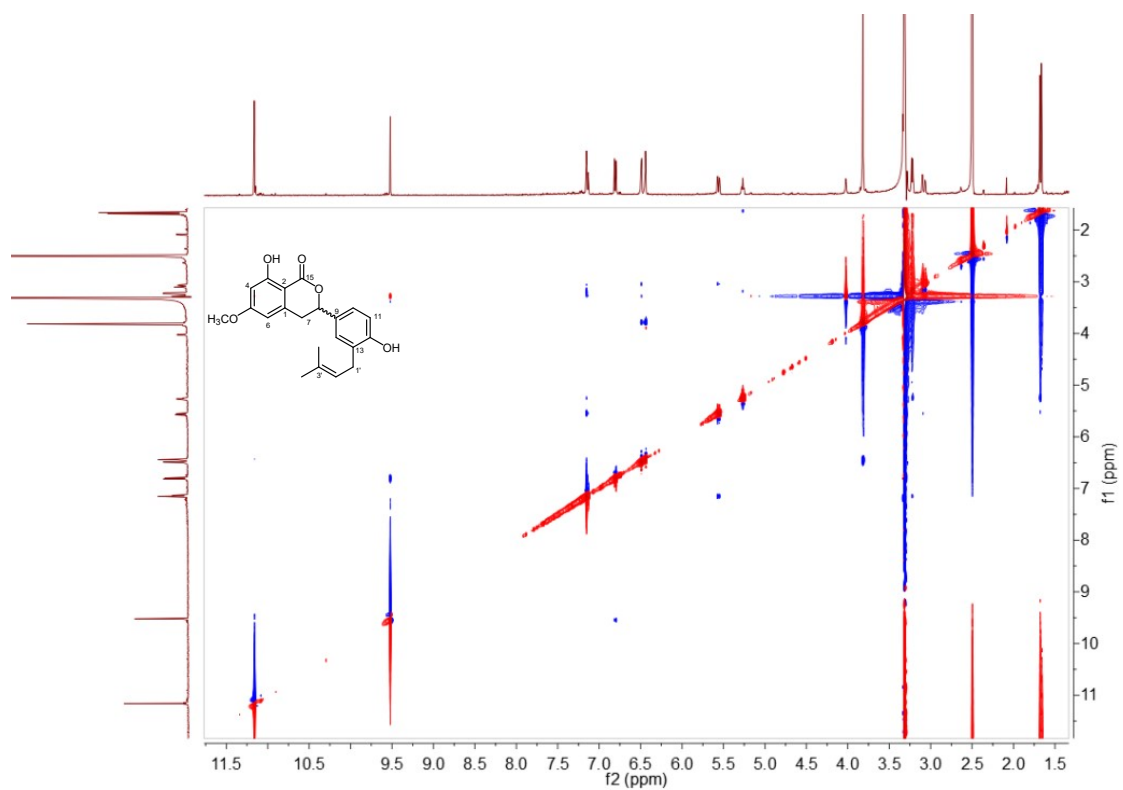

Figure S16. NOESY spectrum of 2.

## Mass Spectrum SmartFormula Report

| Analysis Info         |                                                              |                      |          | Acquisition Date     |              |  |
|-----------------------|--------------------------------------------------------------|----------------------|----------|----------------------|--------------|--|
| Analysis Name         | D:\Data\MS\data\202209\yaoliyuan_HC10-532b_pos_71_01_13623.d |                      |          | 9/8/2022 10:54:16 AM |              |  |
| Method                | LC_Direct Infusion_pos_70-500mz.m                            |                      |          | Operator             | SCSIO        |  |
| Sample Name           | yaoliyuan_HC10-532b_pos                                      |                      |          | Instrument           | maXis        |  |
| Comment               |                                                              |                      |          |                      | 255552.00029 |  |
| Acquisition Parameter |                                                              |                      |          |                      |              |  |
| Source Type           | ESI                                                          | Ion Polarity         | Positive | Set Nebulizer        | 0.4 Bar      |  |
| Focus                 | Active                                                       | Set Capillary        | 4500 V   | Set Dry Heater       | 180 °C       |  |
| Scan Begin            | 100 m/z                                                      | Set End Plate Offset | -500 V   | Set Dry Gas          | 4.0 l/min    |  |
| Scan End              | 1500 m/z                                                     | Set Charging Voltage | 0 V      | Set Divert Valve     | Waste        |  |
|                       |                                                              | Set Corona           | 0 nA     | Set APCI Heater      | 0 °C         |  |

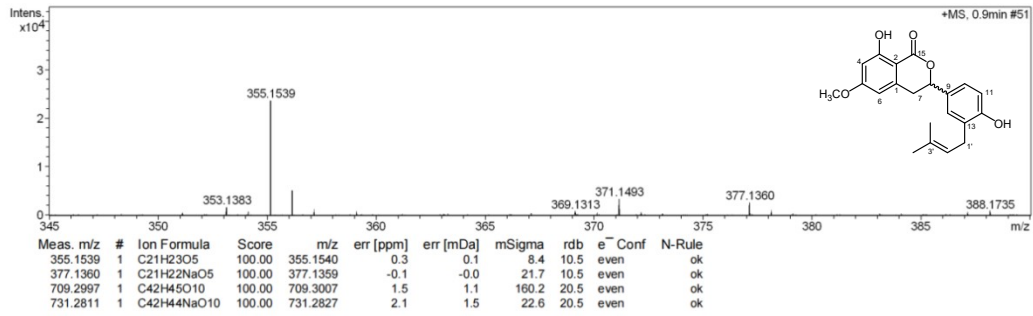

Figure S17. HRESIMS spectrum of 2.

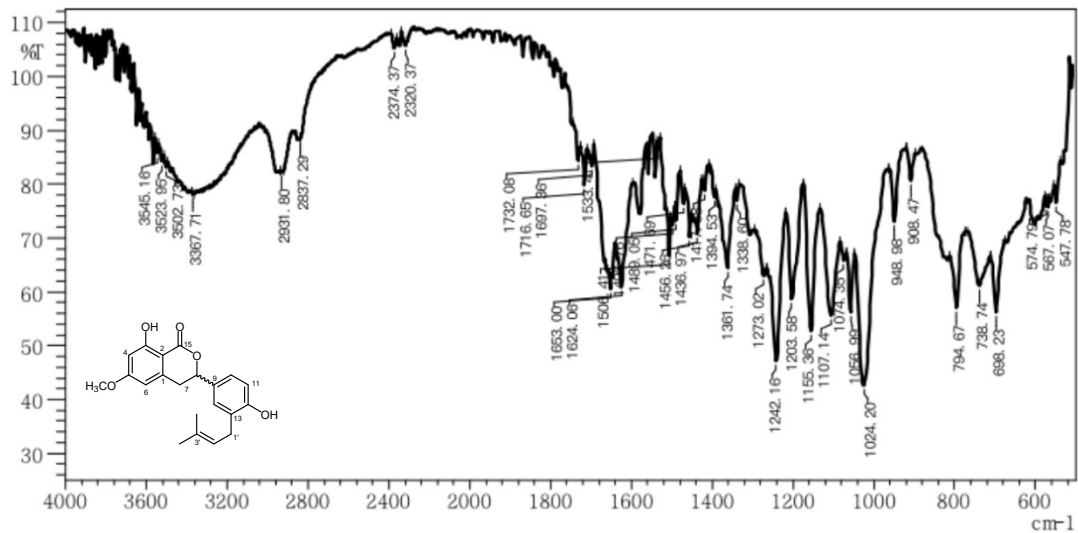

Figure S18. IR spectrum of 2.

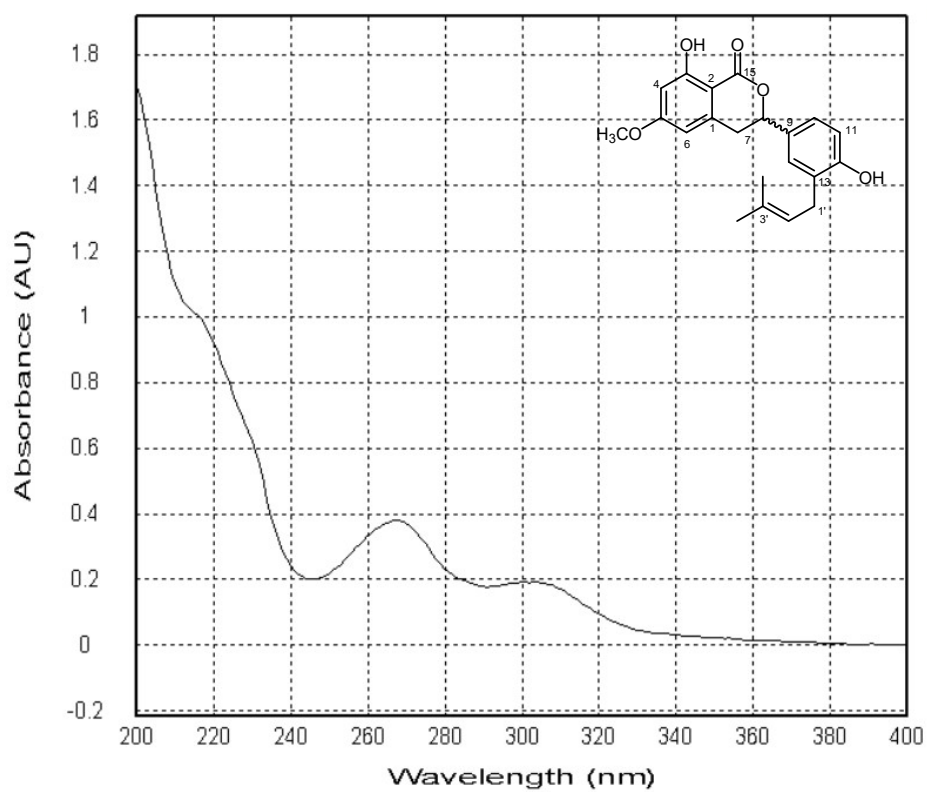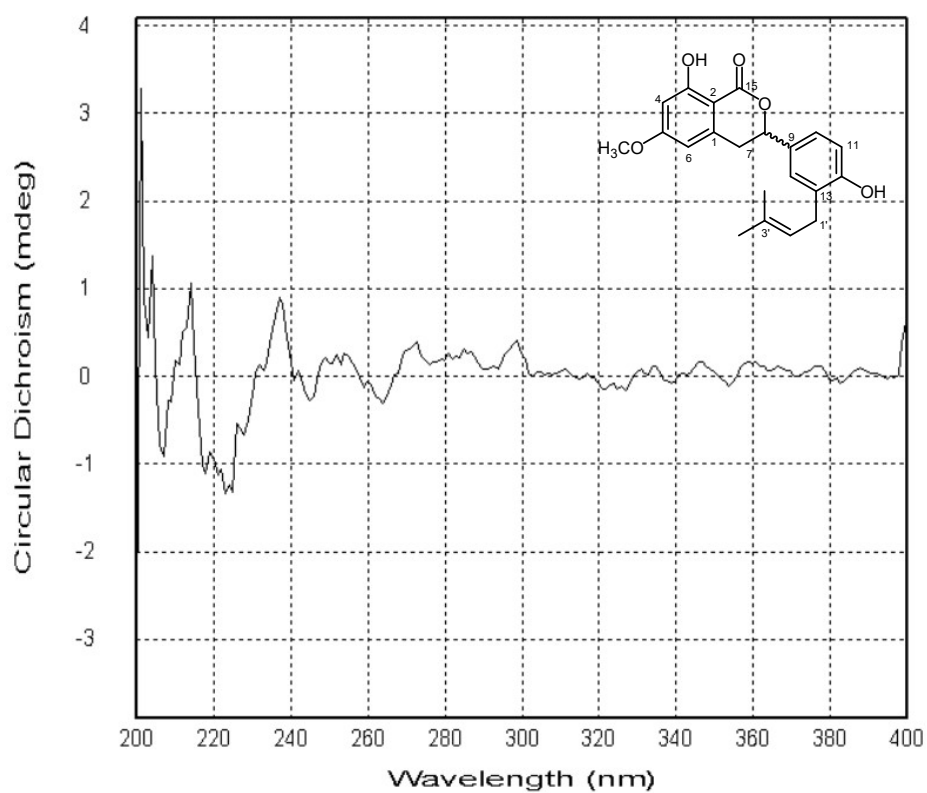

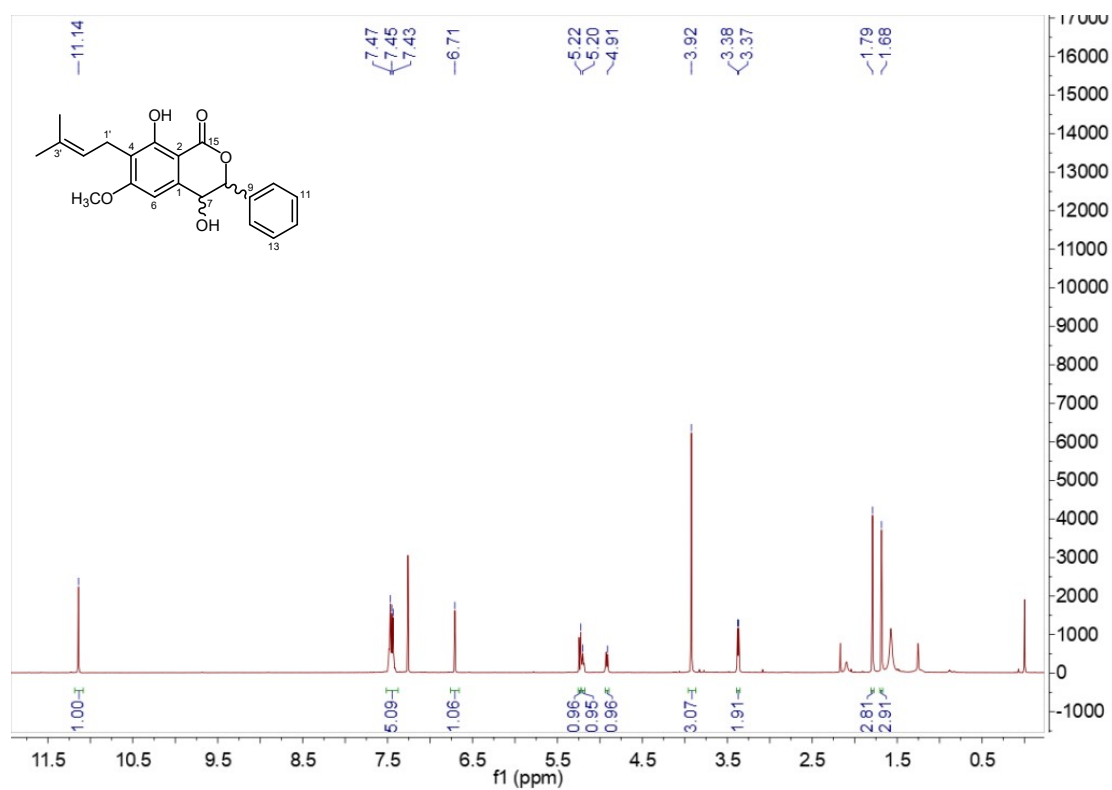

Figure S21. <sup>1</sup>H NMR spectrum (500 MHz, CDCl<sub>3</sub>) of 3.

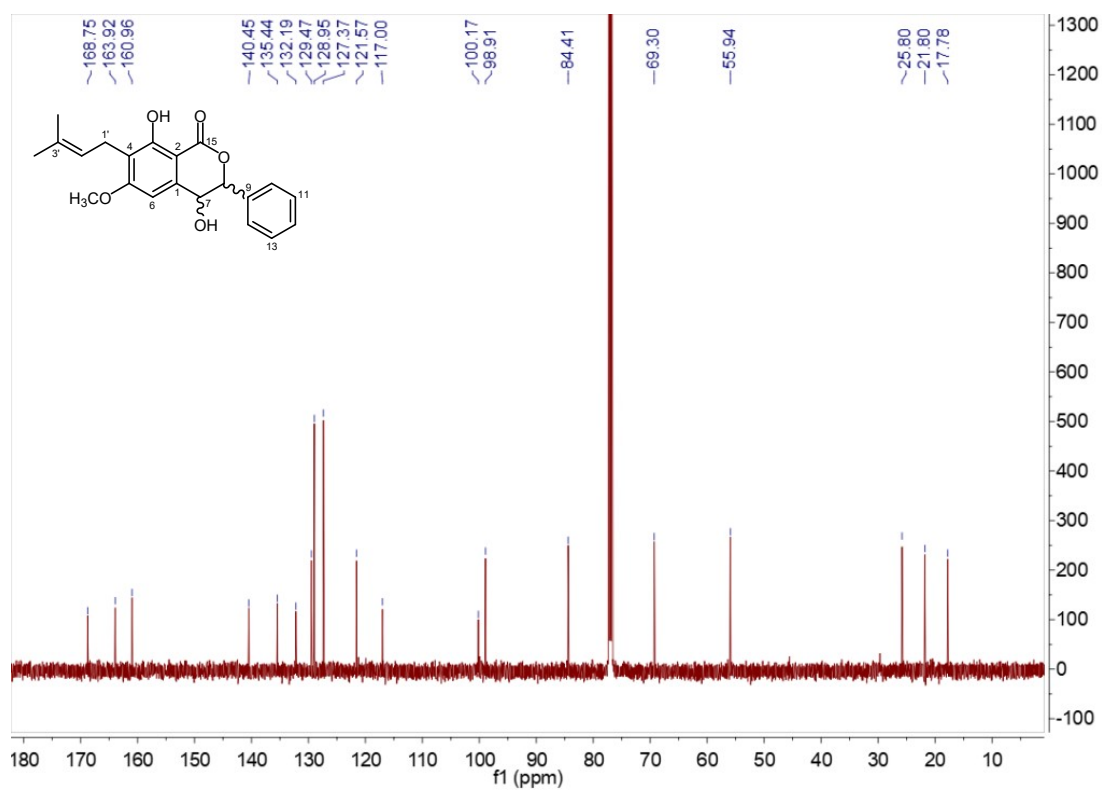

Figure S22. <sup>13</sup>C NMR spectrum (125 MHz, CDCl<sub>3</sub>) of 3.

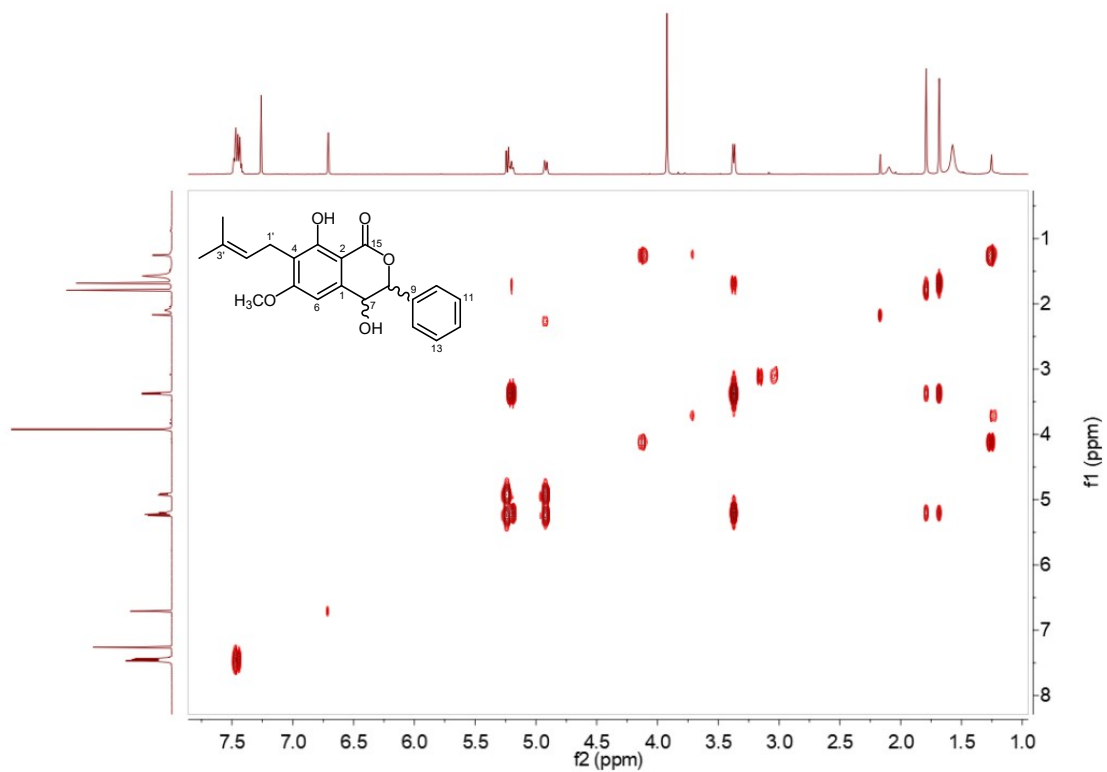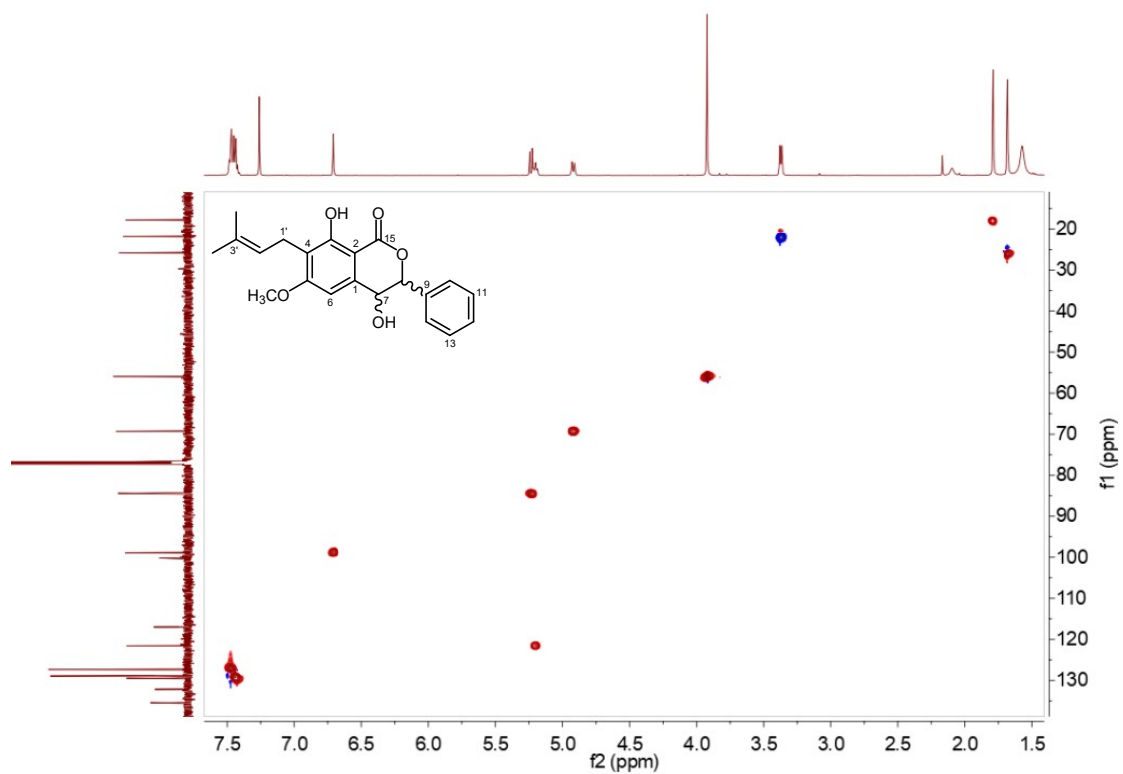

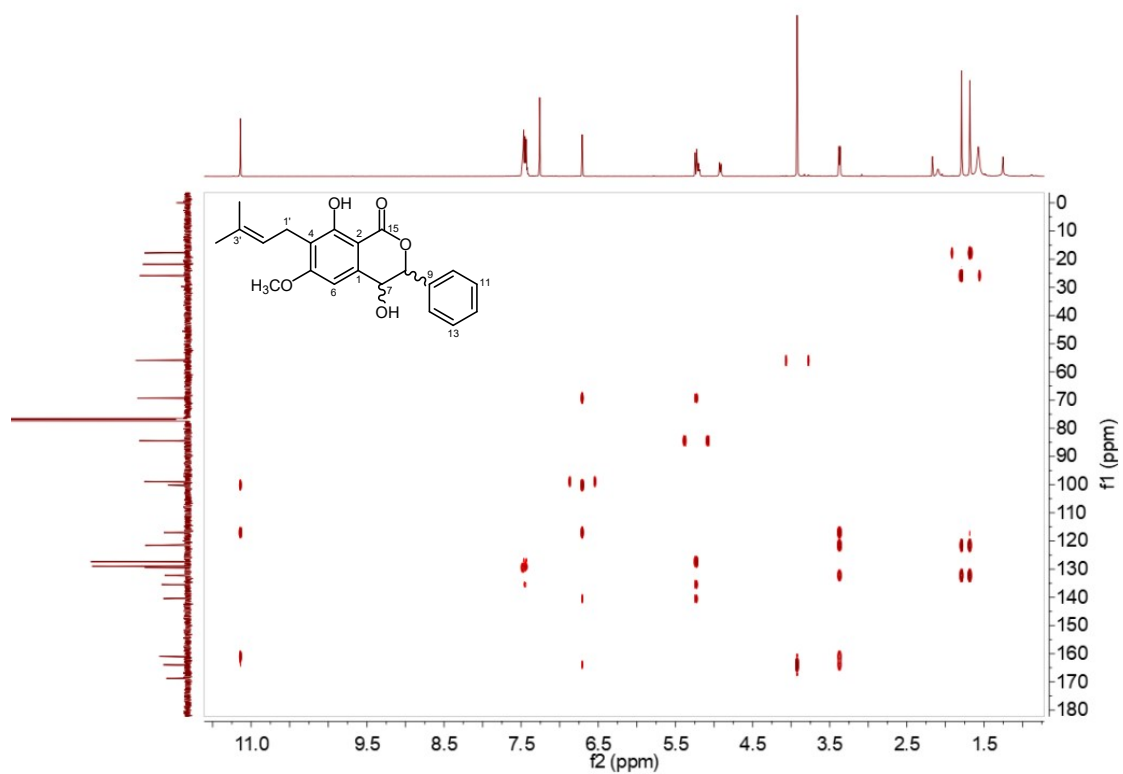

Figure S25. HMBC spectrum of 3.

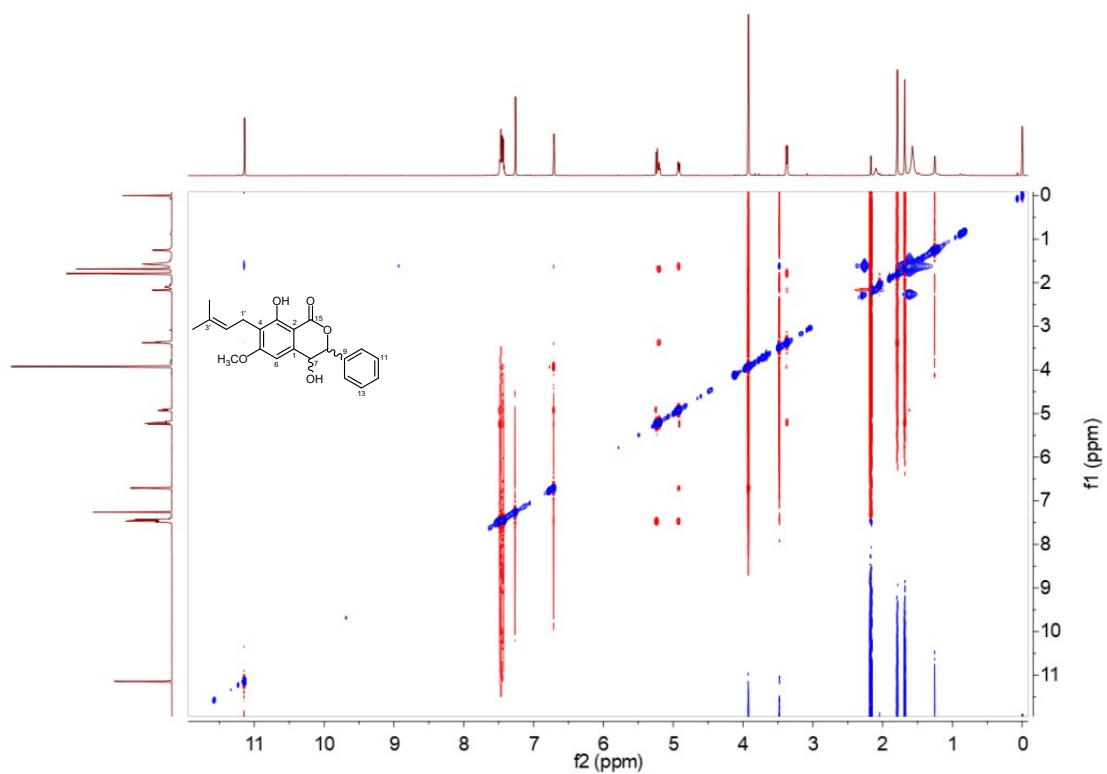

Figure S26. NOESY spectrum of 3.

## Mass Spectrum SmartFormula Report

| Analysis Info |                                                            | Acquisition Date    |              |
|---------------|------------------------------------------------------------|---------------------|--------------|
| Analysis Name | D:\Data\MS\data\202209\yaoliyuan_HC6454d_pos_64_01_13614.d | 9/8/2022 9:33:11 AM |              |
| Method        | LC_Direct Infusion_pos_70-500mz.m                          | Operator            | SCSIO        |
| Sample Name   | yaoliyuan_HC6454d_pos                                      | Instrument          | maxis        |
| Comment       |                                                            |                     | 255552.00029 |

| Acquisition Parameter |          |                      |          |                  |           |
|-----------------------|----------|----------------------|----------|------------------|-----------|
| Source Type           | ESI      | Ion Polarity         | Positive | Set Nebulizer    | 0.4 Bar   |
| Focus                 | Active   | Set Capillary        | 4500 V   | Set Dry Heater   | 180 °C    |
| Scan Begin            | 100 m/z  | Set End Plate Offset | -500 V   | Set Dry Gas      | 4.0 l/min |
| Scan End              | 1500 m/z | Set Charging Voltage | 0 V      | Set Divert Valve | Waste     |
|                       |          | Set Corona           | 0 nA     | Set APCI Heater  | 0 °C      |

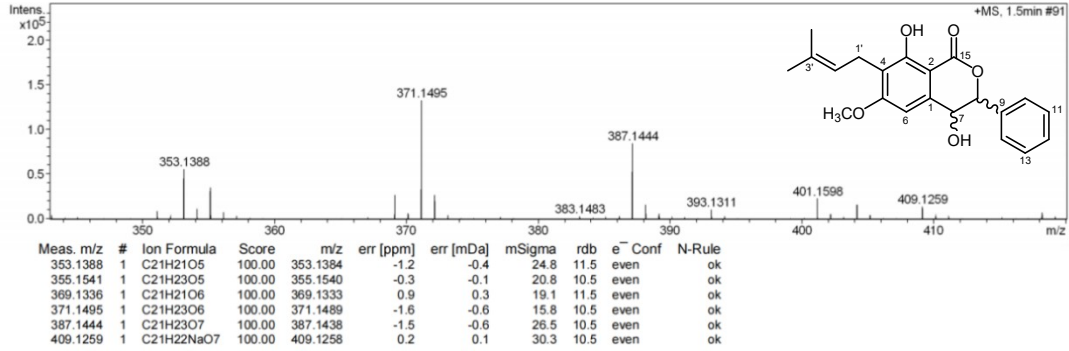

**Figure S27.** HRESIMS spectrum of **3**.

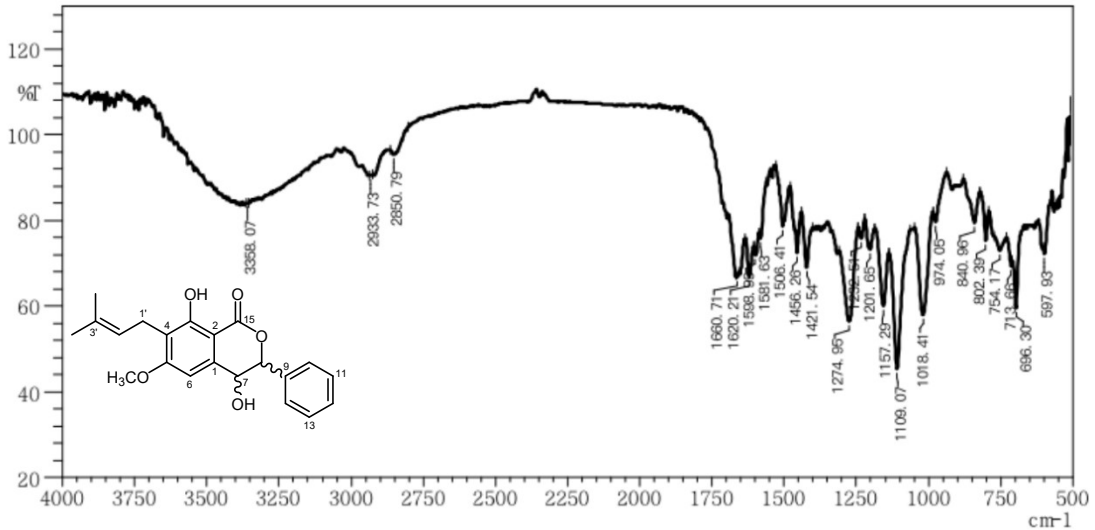

**Figure S28.** IR spectrum of **3**.



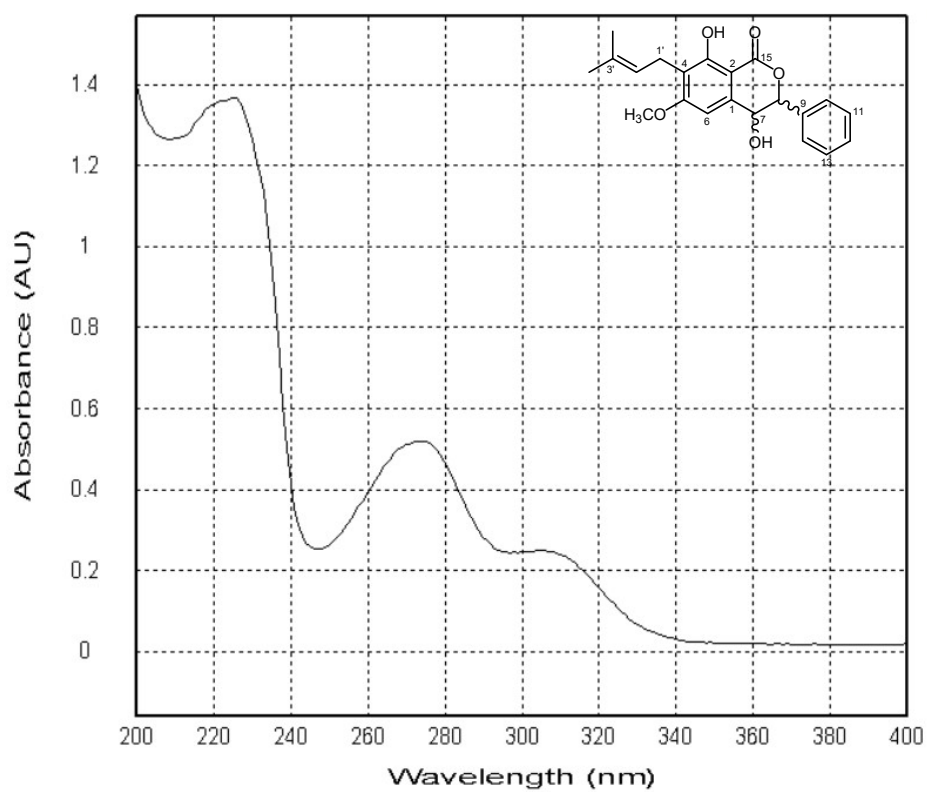

Figure S29. UV spectrum of 3.

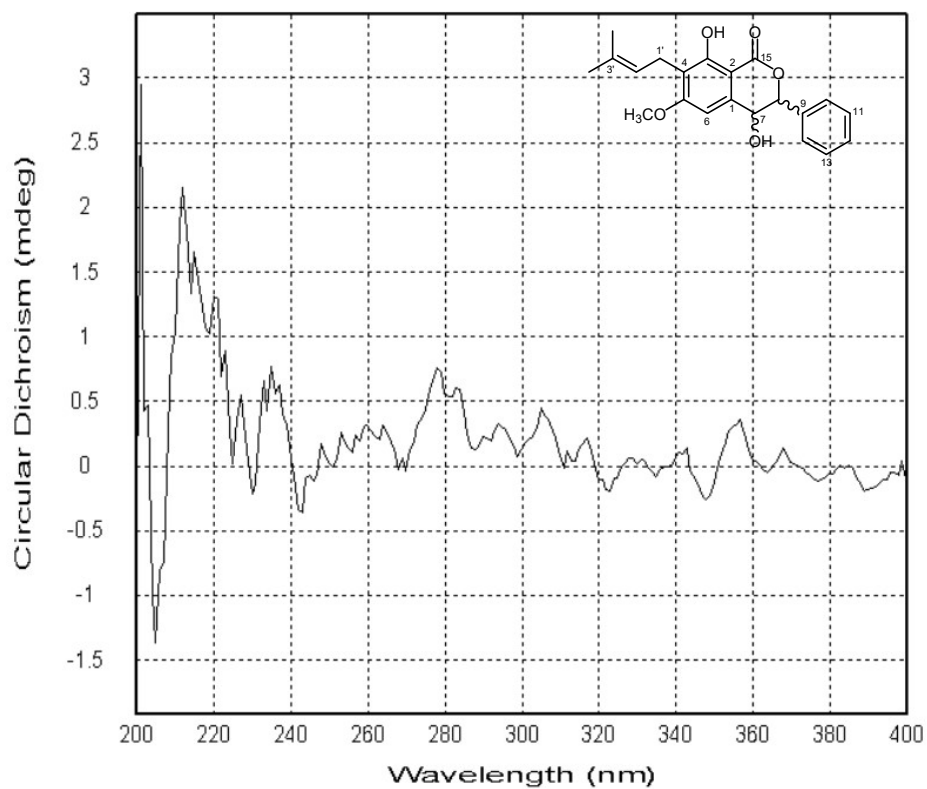

Figure S30. CD spectrum of 3.

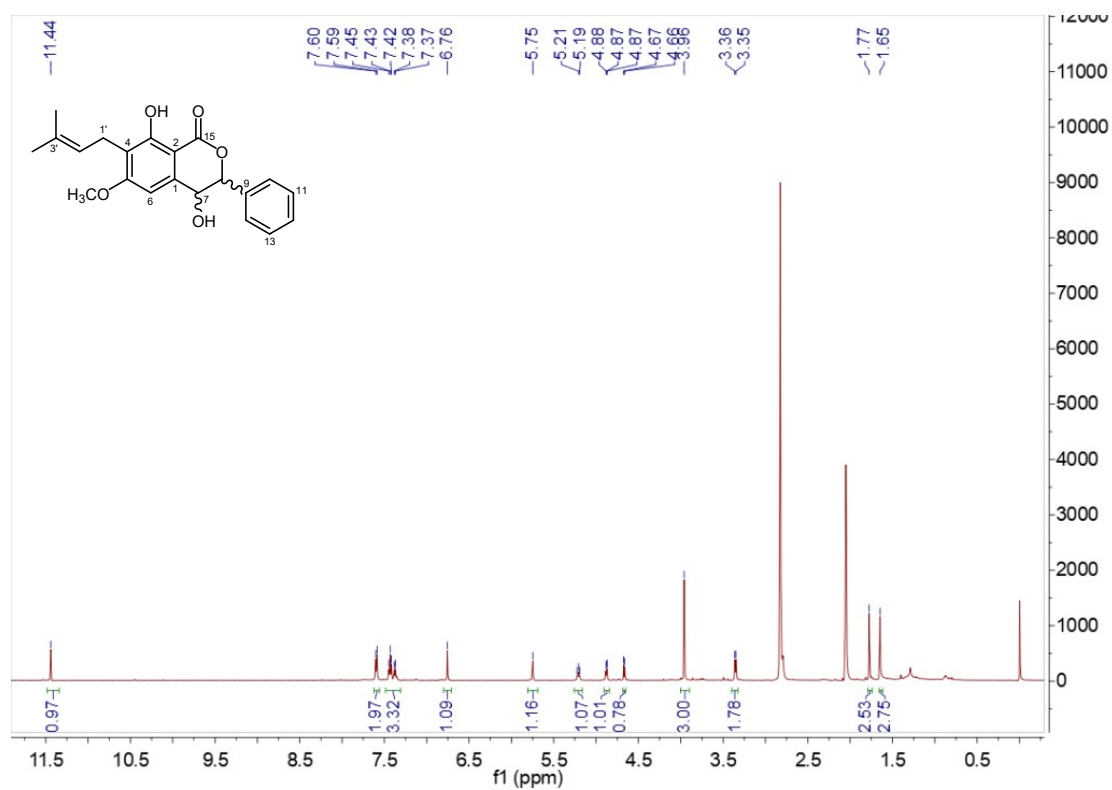

Figure S31. <sup>1</sup>H NMR spectrum (500 MHz, C<sub>3</sub>D<sub>6</sub>O) of 4.

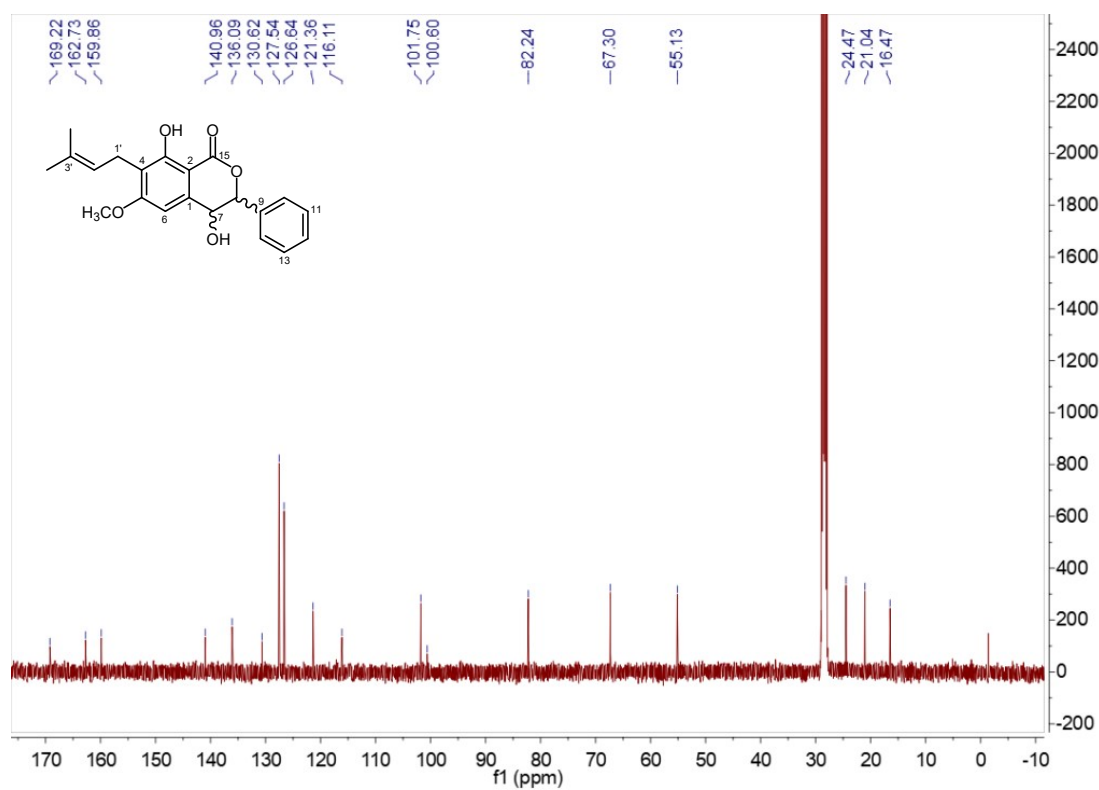

Figure S32. <sup>13</sup>C NMR spectrum (125 MHz, C<sub>3</sub>D<sub>6</sub>O) of 4.

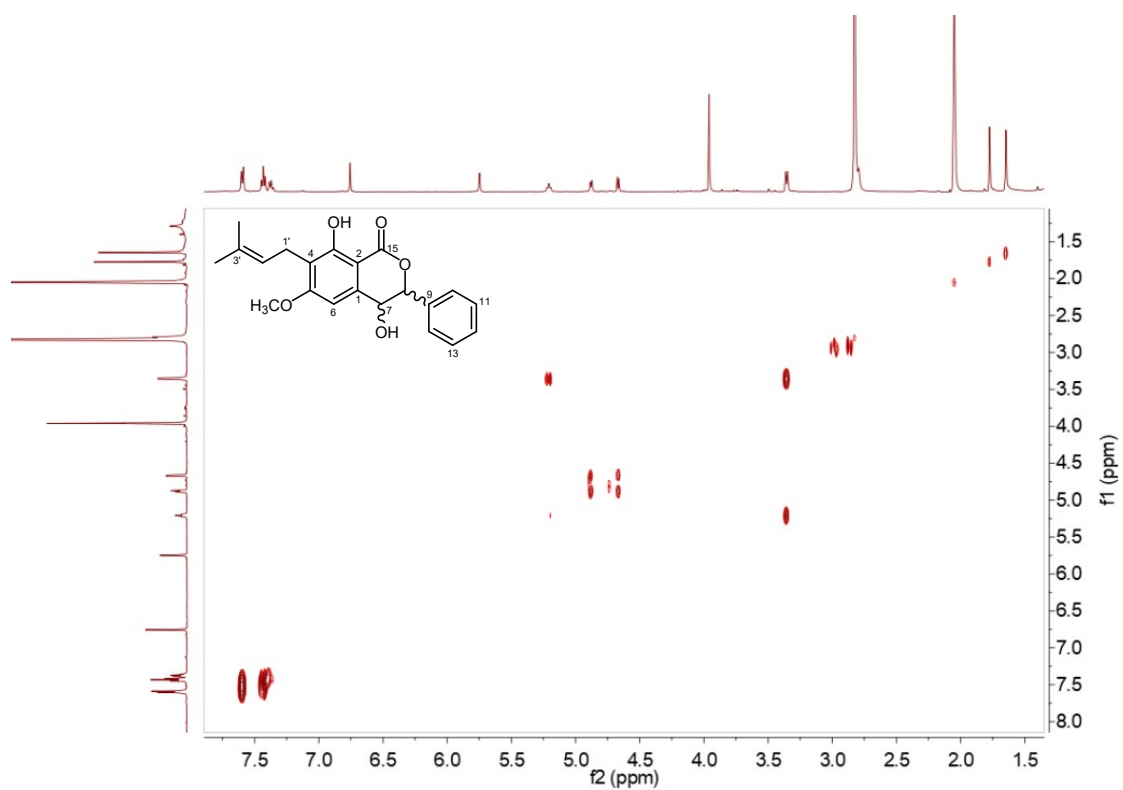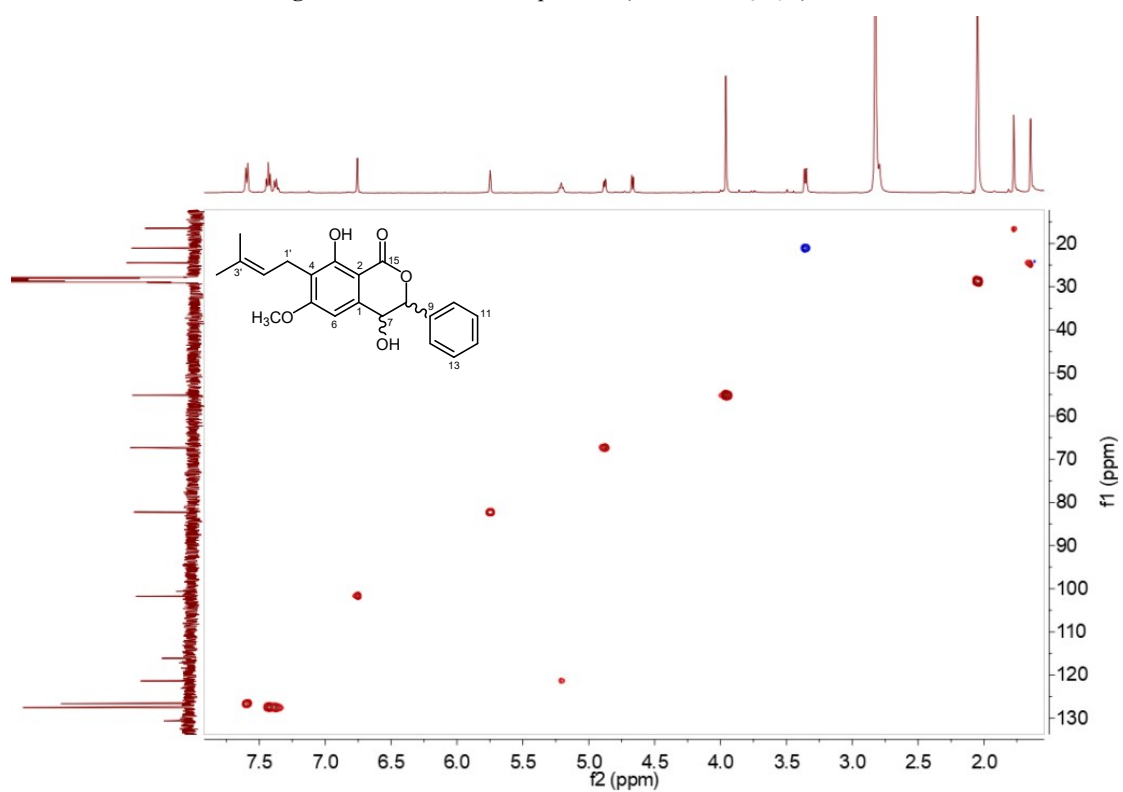

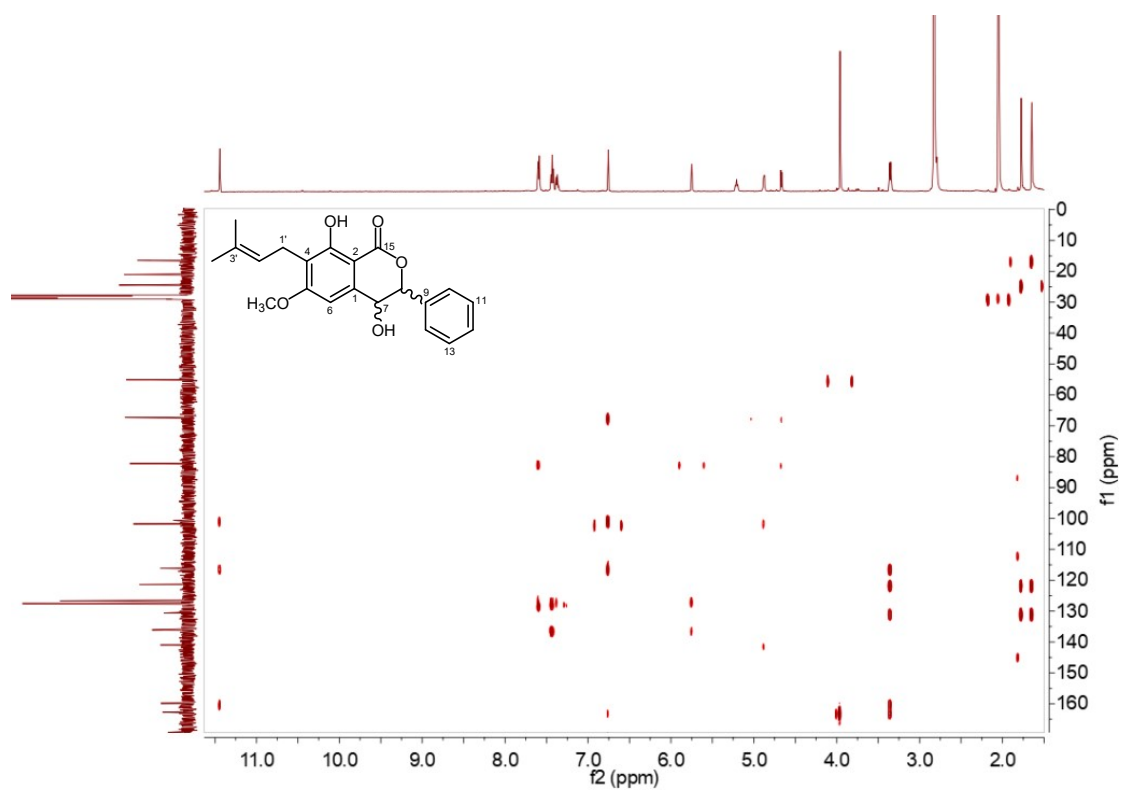

Figure S35. HMBC spectrum of 4.

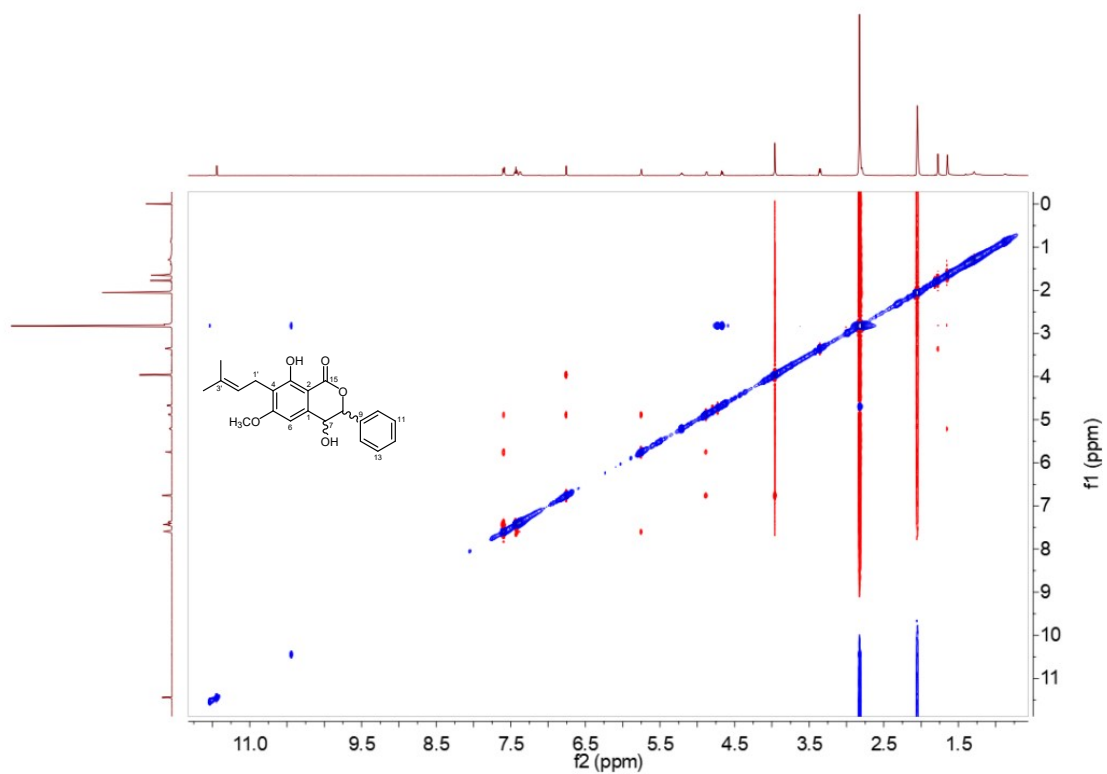

Figure S36. NOESY spectrum of 4.

## Mass Spectrum SmartFormula Report

|                      |                                                            |                  |       |                     |              |
|----------------------|------------------------------------------------------------|------------------|-------|---------------------|--------------|
| <b>Analysis Info</b> |                                                            | Acquisition Date |       | 9/8/2022 9:29:41 AM |              |
| Analysis Name        | D:\Data\MS\data\202209\yaoliyuan_HC6454c_pos_63_01_13613.d | Operator         | SCSIO | Instrument          | maXis        |
| Method               | LC_Direct Infusion_pos_70-500mz.m                          |                  |       |                     |              |
| Sample Name          | yaoliyuan_HC6454c_pos                                      |                  |       |                     | 255552.00029 |
| Comment              |                                                            |                  |       |                     |              |

|                              |          |                      |          |                  |           |
|------------------------------|----------|----------------------|----------|------------------|-----------|
| <b>Acquisition Parameter</b> |          |                      |          |                  |           |
| Source Type                  | ESI      | Ion Polarity         | Positive | Set Nebulizer    | 0.4 Bar   |
| Focus                        | Active   | Set Capillary        | 4500 V   | Set Dry Heater   | 180 °C    |
| Scan Begin                   | 100 m/z  | Set End Plate Offset | -500 V   | Set Dry Gas      | 4.0 l/min |
| Scan End                     | 1500 m/z | Set Charging Voltage | 0 V      | Set Divert Valve | Waste     |
|                              |          | Set Corona           | 0 nA     | Set APCI Heater  | 0 °C      |

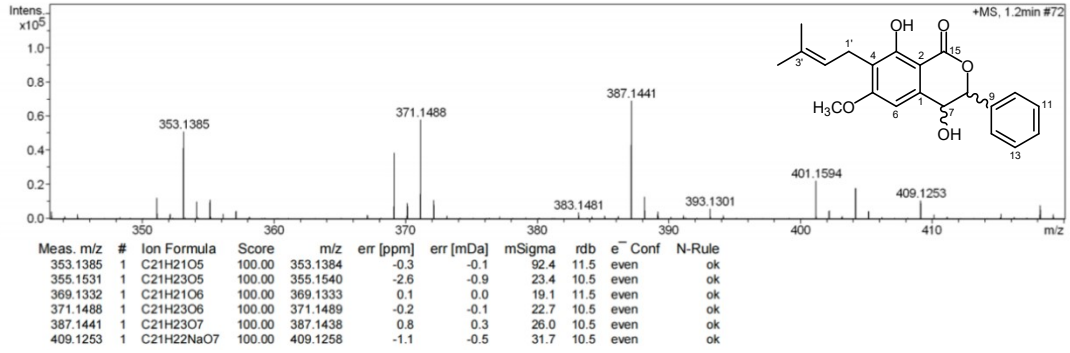

Figure S37. HRESIMS spectrum of 4.

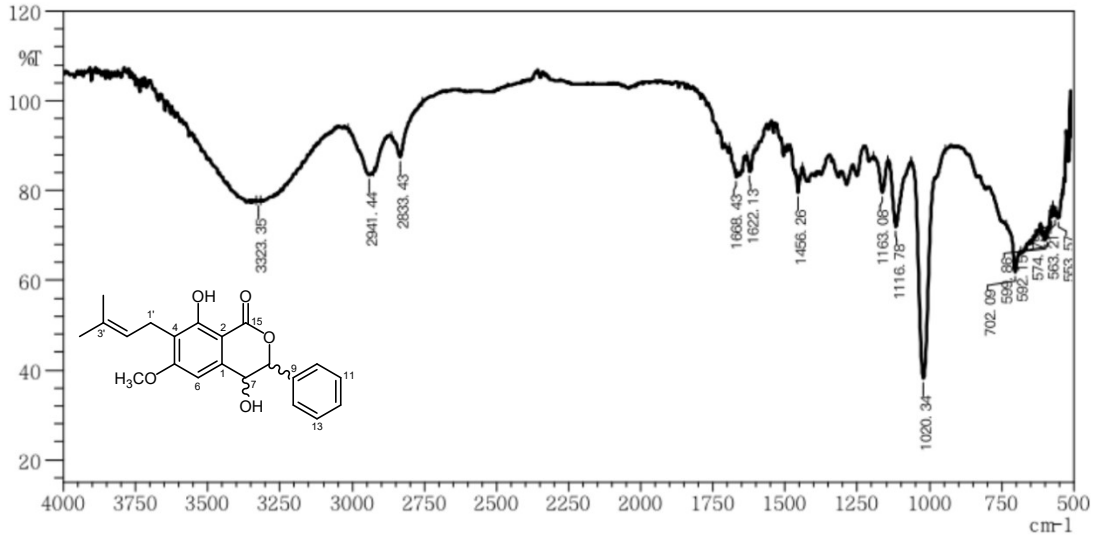

Figure S38. IR spectrum of 4.

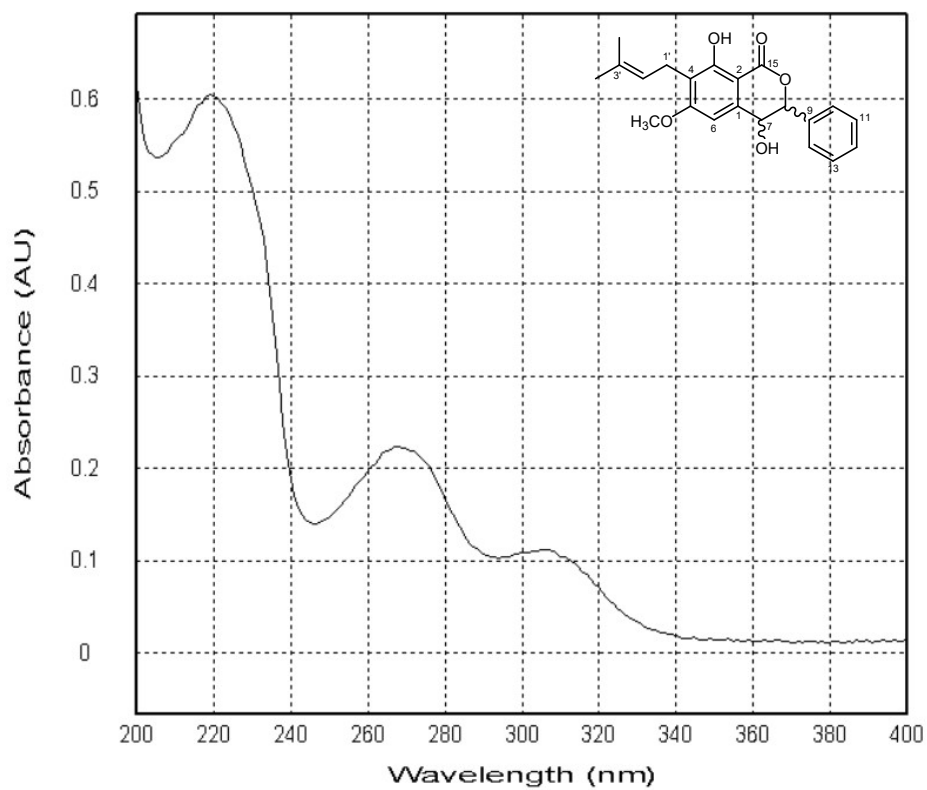

Figure S39. UV spectrum of 4.

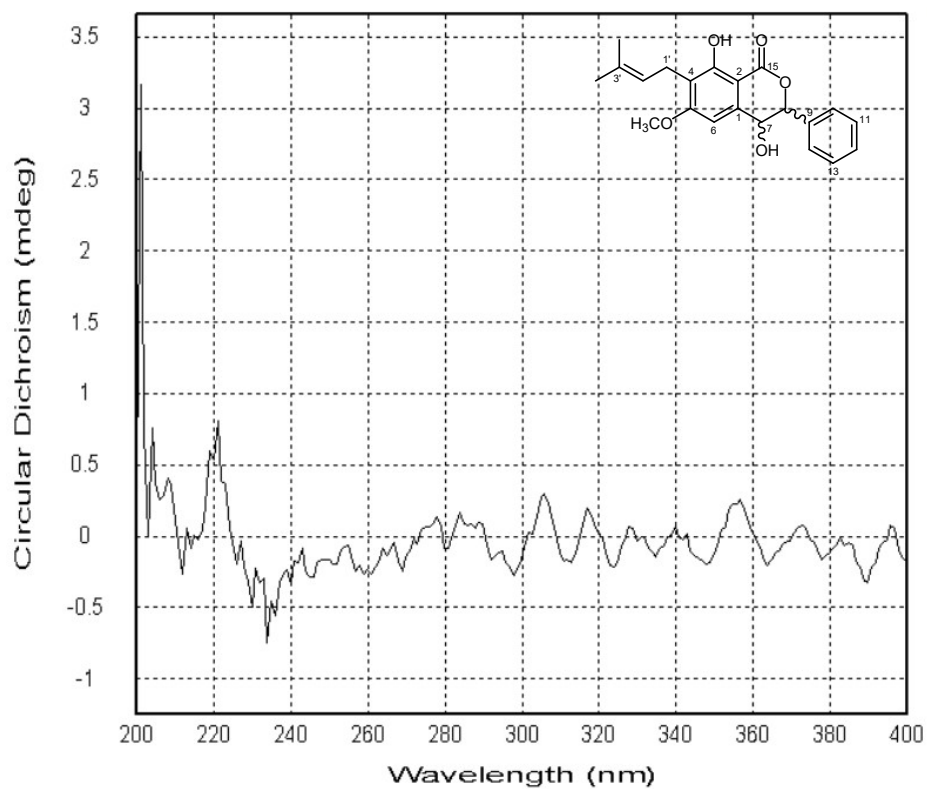

Figure S40. CD spectrum of 4.
